# Supplementary material for: 3D hierarchical CuO/Co3O4 core–shell nanowire array on copper foam for on-demand hydrogen generation from alkaline NaBH4 solution
Source: Royal Society of Chemistry journal article supplement (doi:10.1039/c6ra17340c), 2016-01-01
Supplement: c6ra17340c1.pdf [file c6ra17340c1.pdf]

## Electronic Supplementary Information

### Experimental Section

**Materials:**  $\text{CoSO}_4 \cdot 7\text{H}_2\text{O}$  and urea were purchased from Aladdin Ltd. (Shanghai, China). Hydrochloric acid (HCl), sodium hydroxide (NaOH), and ammonium persulfate (APS) were purchased from Tianjin Fuchen Chemical Reagent Factory. *CF* was purchased from Ailantian Advanced Technology Materials Co. Ltd (Dalian, China). The water used throughout all experiments was purified through a Millipore system. All chemicals were used as received without further purification.

**Preparation of  $\text{Cu}(\text{OH})_2$  NA/CF:**  $\text{Cu}(\text{OH})_2$  NA/CF was made according to our previous report.<sup>1</sup> In brief, copper foam was washed with diluted HCl and water several times to remove the surface impurities. Then a piece of CF was rapidly immersed into a 30 mL mixed solution (4 mmol APS and 80 mmol NaOH) at room temperature for 30 minutes. The resulting  $\text{Cu}(\text{OH})_2$  NA/CF was dried at 60 °C for 12 h in vacuum oven for use.

**Preparation of  $\text{CuO}/\text{Co}_3\text{O}_4$  core-shell NA/CF:** In a typical procedure, 0.79 g  $\text{CoSO}_4 \cdot 7\text{H}_2\text{O}$  and 0.785 g of urea were dissolved in 37 mL of distilled water and stirred to form a clear pink solution. This solution was transferred to a 50 ml Teflon-lined stainless steel autoclave, followed by inserting of a piece of  $\text{Cu}(\text{OH})_2$  NA/CF. The autoclave was sealed and maintained at 85 °C for 2 h. The substrates were then taken out from the solution, rinsed with distilled water, and dried at 60 °C for 12 h in vacuum oven. Finally, the resulting  $\text{Cu}(\text{OH})_2/\text{CoCO}_3(\text{OH})_2 \cdot n\text{H}_2\text{O}$  core-shell NA/CF were annealed at 300 °C in air for 2 h for  $\text{CuO}/\text{Co}_3\text{O}_4$  NA/CF. The actual loading of the  $\text{CuO}/\text{Co}_3\text{O}_4$  core-shell NA on CF is measured by inductively coupled plasma mass spectrometry (ICP-MS) (the loading per unit area is 0.9  $\text{mg}/\text{cm}^2$ ), and we can maintain the ratio of  $\text{CuO} : \text{Co}_3\text{O}_4$  for different loadings by controlling the area of the catalyst.

**Hydrogen generation measurement:** All hydrolysis experiments were performed in a 25 mL two-necked round-bottom flask with 2 mL aqueous solution at ambient

pressure. The solution temperature was controlled by using a constant temperature water bath device. The volume of displaced water was determined using an electronic balance connected to a computer and the weight data were automatically recorded by a data acquisition software (Fig. S1).

**Characterizations:** Powder X-ray diffraction (XRD) data were collected on a RigakuD/MAX 2550 diffractometer with Cu K $\alpha$  radiation ( $\lambda=1.5418$  Å). Scanning electron microscopy (SEM) measurements were carried out on a Hitachi S-4800 field emission scanning electron microscope at an accelerating voltage of 20 kV. X-ray photoelectron spectroscopy (XPS) data were collected on an ESCALABMK II X-ray photoelectron spectrometer using Mg as the exciting source. Inductively coupled plasma mass spectrometry (ICP-MS) analysis was performed on ThermoScientific iCA.

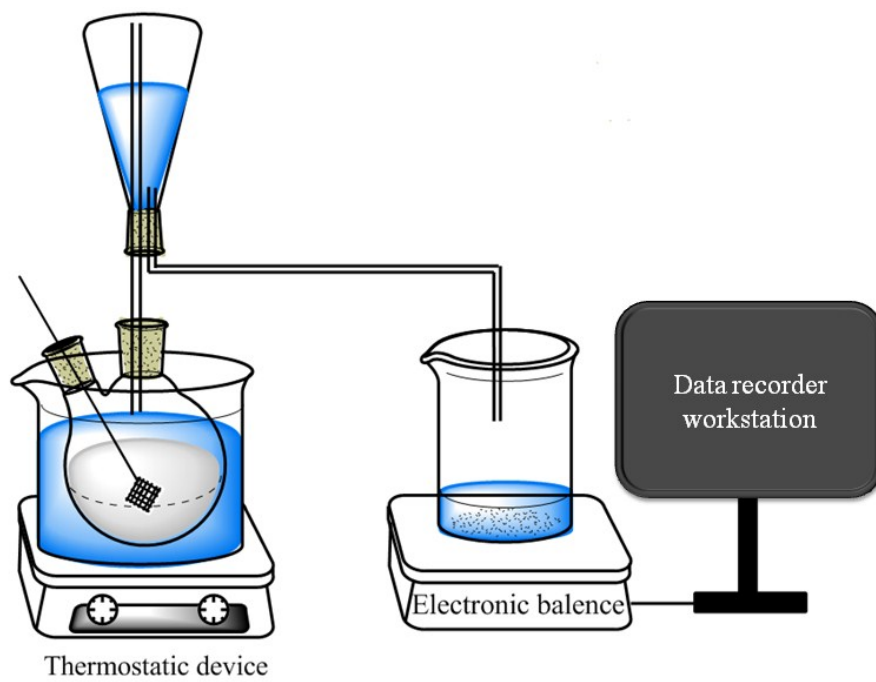

**Fig. S1.** Schematic diagram of HGR measurement system.

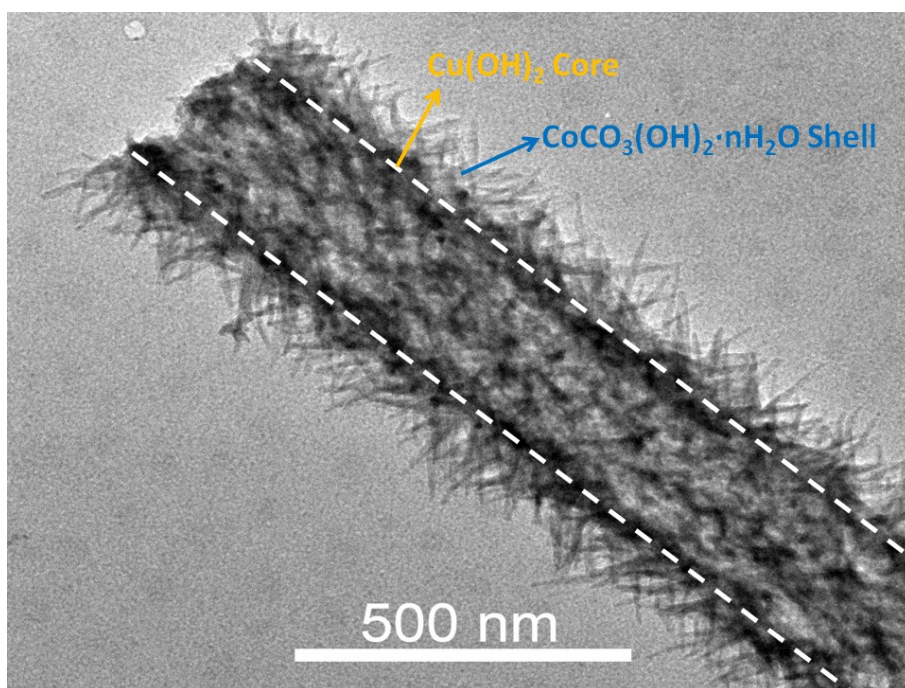

**Fig. S2.** TEM image for Cu(OH)<sub>2</sub>/CoCO<sub>3</sub>(OH)<sub>2</sub>·nH<sub>2</sub>O core-shell NA/CF.

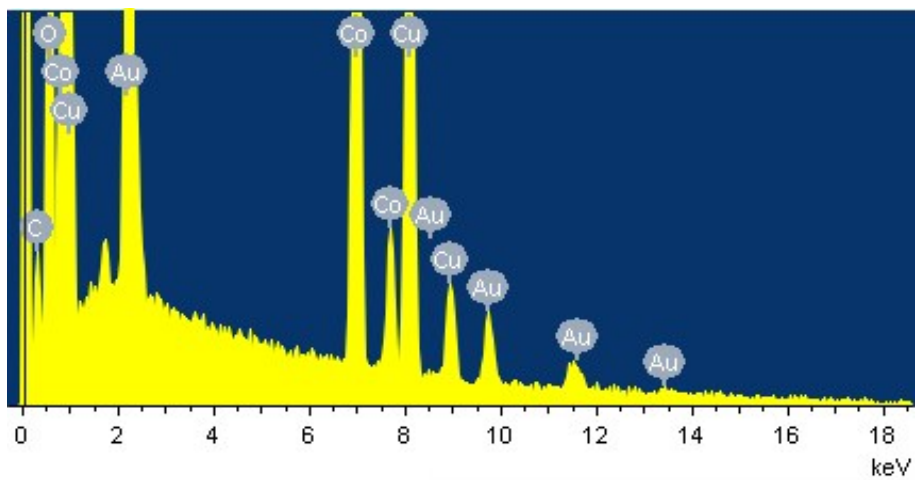

**Fig. S3.** EDX spectrum for CuO/Co<sub>3</sub>O<sub>4</sub> core-shell NA/CF.

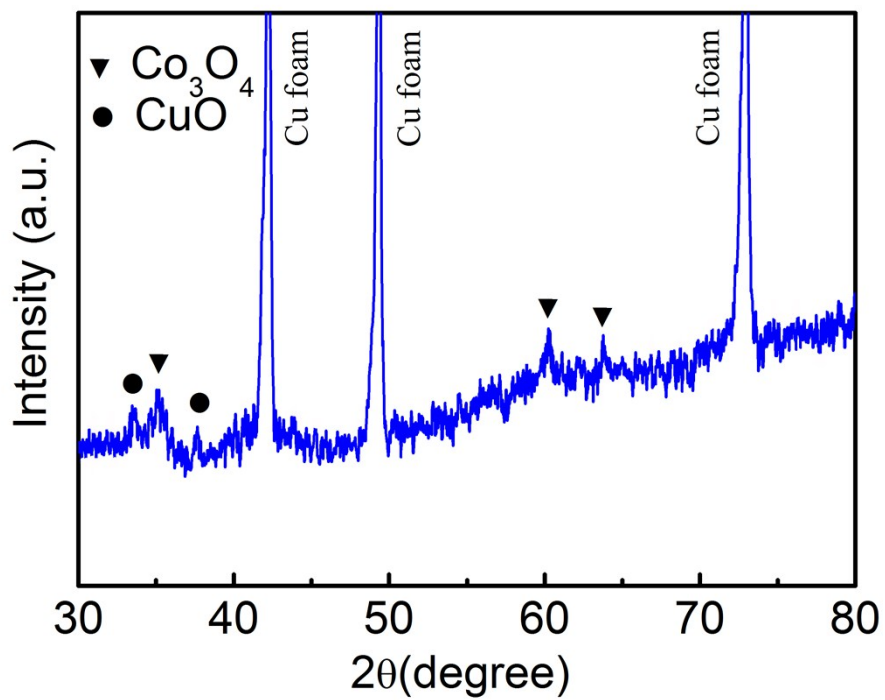

**Fig. S4.** XRD pattern for CuO/ $\text{Co}_3\text{O}_4$  core-shell NA/CF.

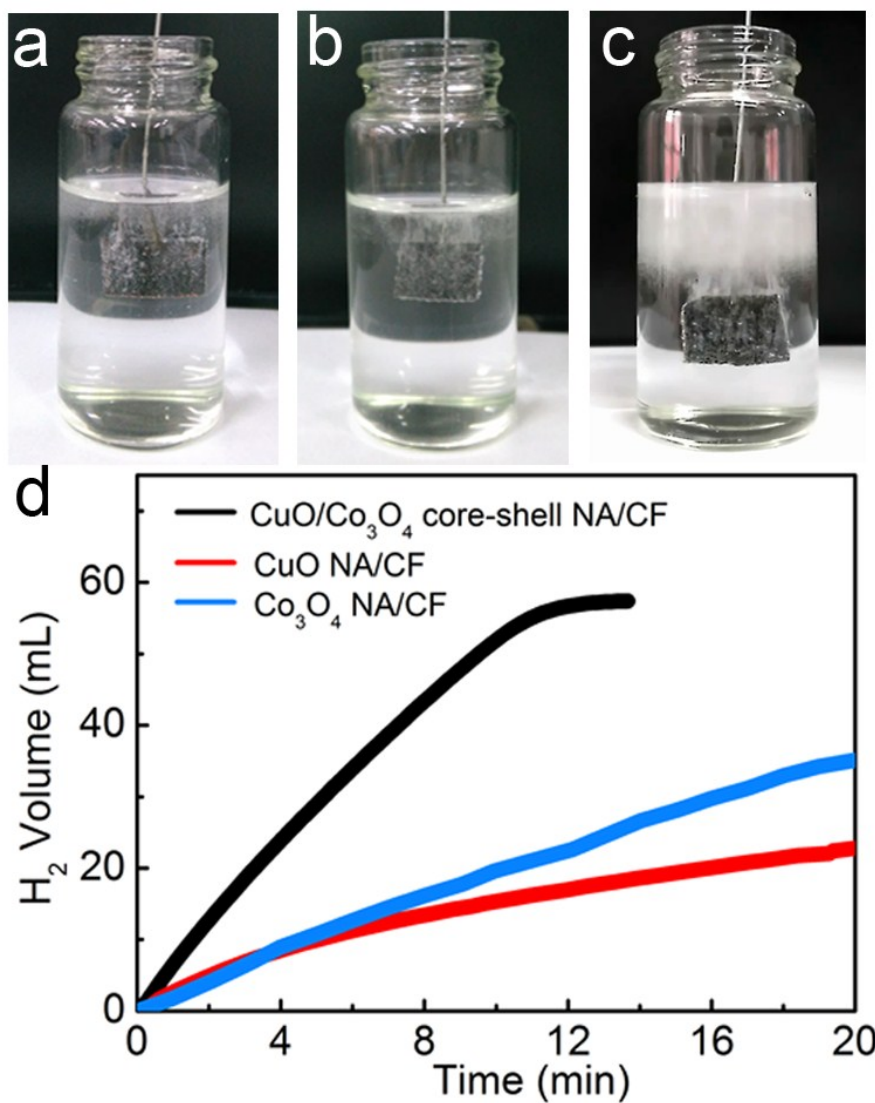

**Fig. S5.** Optical photograph of NaBH<sub>4</sub> hydrolysis reaction catalyzed by (a) CuO NA/CF, (b) Co<sub>3</sub>O<sub>4</sub> NA/CF, and (c) CuO/Co<sub>3</sub>O<sub>4</sub> core-shell NA/CF using 1 wt.% NaOH and 1 wt.% NaBH<sub>4</sub> solution at 298 K and the corresponding plots of the volume of hydrogen vs time (d).

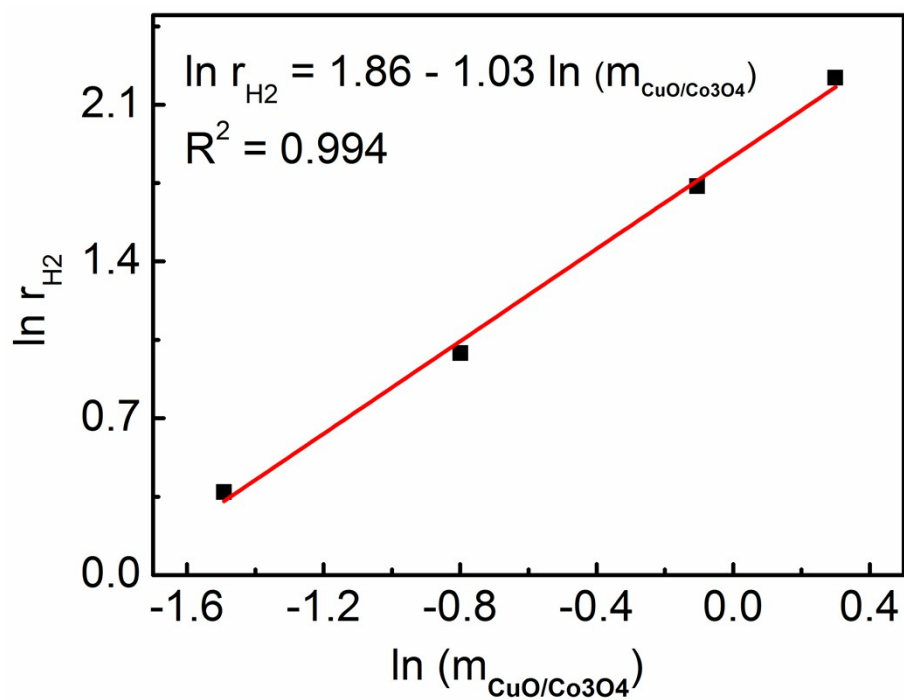

**Fig. S6.** Plot of the hydrogen generation rate versus the catalyst loading (both in logarithmic scale) for the same reactions.



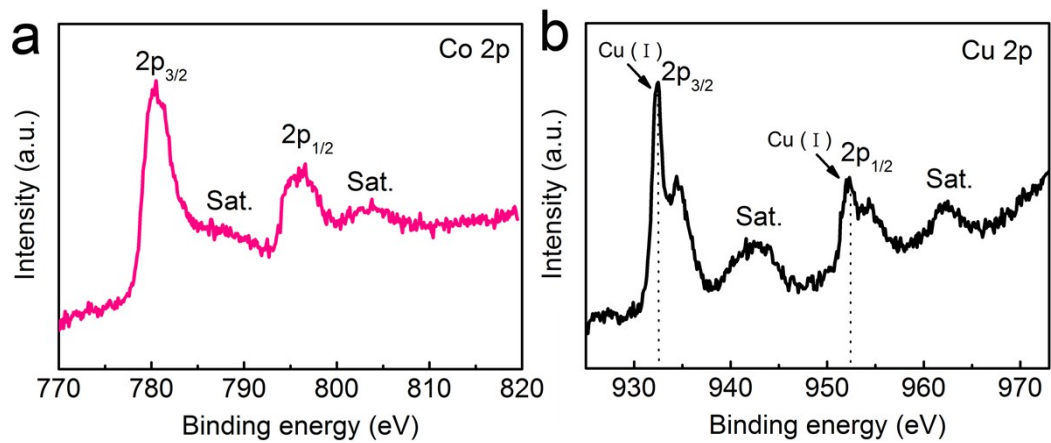

**Fig. S7.** XPS spectra for CuO/Co<sub>3</sub>O<sub>4</sub> core-shell NA/CF after hydrolysis. (a) Cu 2p and (b) Co 2p regions.

**Table S1.** Comparison of  $E_a$  and HGR for the hydrolysis of  $\text{NaBH}_4$  using Co-based catalysts.

| Catalyst                                                    | $E_a$<br>(KJ/mol) | HGR<br>(L/min/g <sub>cat</sub> ) | Temperature<br>(K) | Ref.             |
|-------------------------------------------------------------|-------------------|----------------------------------|--------------------|------------------|
| Co-P                                                        | 60.2              | 3.30                             | 303                | 2                |
| CoO nanocrystals                                            | 59.7              | 8.33                             | 303                | 3                |
| LiCoO <sub>2</sub>                                          | -                 | 1.54                             | 303                | 4                |
| Co <sub>3</sub> O <sub>4</sub>                              | -                 | 3.90                             | 303                | 5                |
| CoCl <sub>2</sub>                                           | 52.86             | 1.16                             | 298                | 6                |
| Co                                                          | -                 | 0.10                             | 293                | 7                |
| Co-B/CB                                                     | 57.8              | 3.90                             | 303                | 8                |
| Ni-Co-B                                                     | 62.0              | 2.68                             | 301                | 9                |
| Co <sub>2</sub> B (Co <sub>3</sub> O <sub>4</sub> )         | 77.96             | 1.80                             | 298                | 10               |
| Ru/LiCoO <sub>2</sub>                                       | 68.5              | 0.20                             | 298                | 11               |
| Co-B                                                        | 64.87             | 1.10                             | 293                | 12               |
| Co/IR-120                                                   | 54.1              | 1.24                             | 293                | 13               |
| <b>CuO/Co<sub>3</sub>O<sub>4</sub> core-shell<br/>NA/CF</b> | <b>56.38</b>      | <b>6.16</b>                      | <b>298</b>         | <b>This work</b> |

## References

- 1 J. Tian, Q. Liu, N. Cheng, A. M. Asiri and X. Sun, *Angew. Chem. Int. Ed.*, 2014, **53**, 9577-9581.
- 2 K. Eom, K. Cho and H. Kwon, *J. Power Sources*, 2008, **180**, 484-490.
- 3 A. Lu, Y. Chen, J. Jin, G. Yue and D. Peng, *J. Power Sources*, 2012, **220**, 391-398.
- 4 O. V. Komova, V. I. Simagina, O. V. Netskina, D. G. Kellerman, A. V. Ishchenko and N. A. Rudina, *Catal. Today*, 2008, **138**, 260-265.
- 5 L. Damjanović, M. Majchrzak, S. Bennici and A. Auroux, *Int. J. Hydrogen Energy*, 2011, **36**, 1991-1997.
- 6 F. Li, E. E. Arthur, D. La, Q. Li and H. Kim, *Energy*, 2014, **71**, 32-39.
- 7 B. Liu, Z. Li and S. Suda, *J. Alloys Compd.*, 2006, **415**, 288-293.
- 8 J. Zhao, H. Ma and J. Chen, *J. Hydrogen Energy*, 2007, **32**, 4711-4716.
- 9 J. C. Ingersoll, N. Mani, J. C. Thenmozhiyal and A. Muthaiah, *J. Power Sources*, 2007, **173**, 450-457.
- 10 P. Krishnan, S. G. Advani and A. K. Prasad, *Int. J. Hydrogen Energy*, 2008, **33**, 7095-7102.
- 11 Z. Liu, B. Guo, S. Chan, E. Tang and L. Hong, *J. Power Sources*, 2008, **176**, 306-311.
- 12 S. U. Jeong, R. K. Kim, E. A. Cho, H. J. Kim, S. W. Nam, I. H. Oh, S. A. Hong and S. H. Kim, *J. Power Sources*, 2005, **144**, 129-134.

- 13 T. Pfeil, T. Pourpoint and L. Groven, *Int. J. Hydrogen Energy*, 2014, **39**, 2149-2159.
